# Supplementary material
Source: PubMed Central journal article supplement (PMC1544137)

1H\_3merisopropyl

Solvent: CDCl3

Temp. 22.8 C / 295.9K

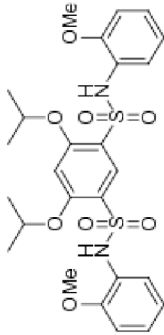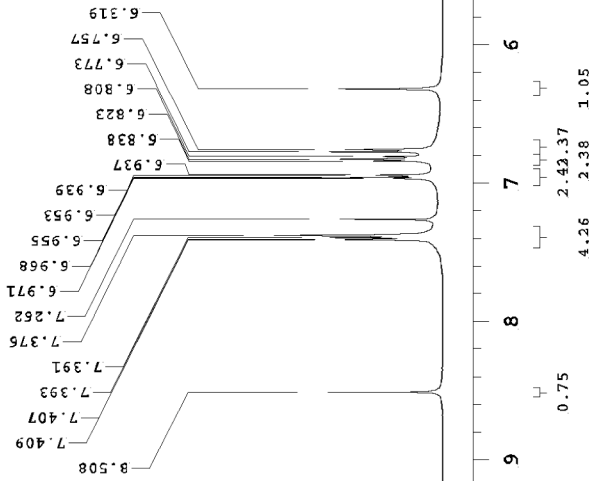

Supplement: pnas_0602912103_1.pdf [file pnas_0602912103_1.pdf]

LH\_3merNHSO2\_isCp-propyl

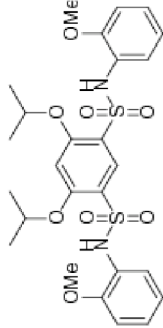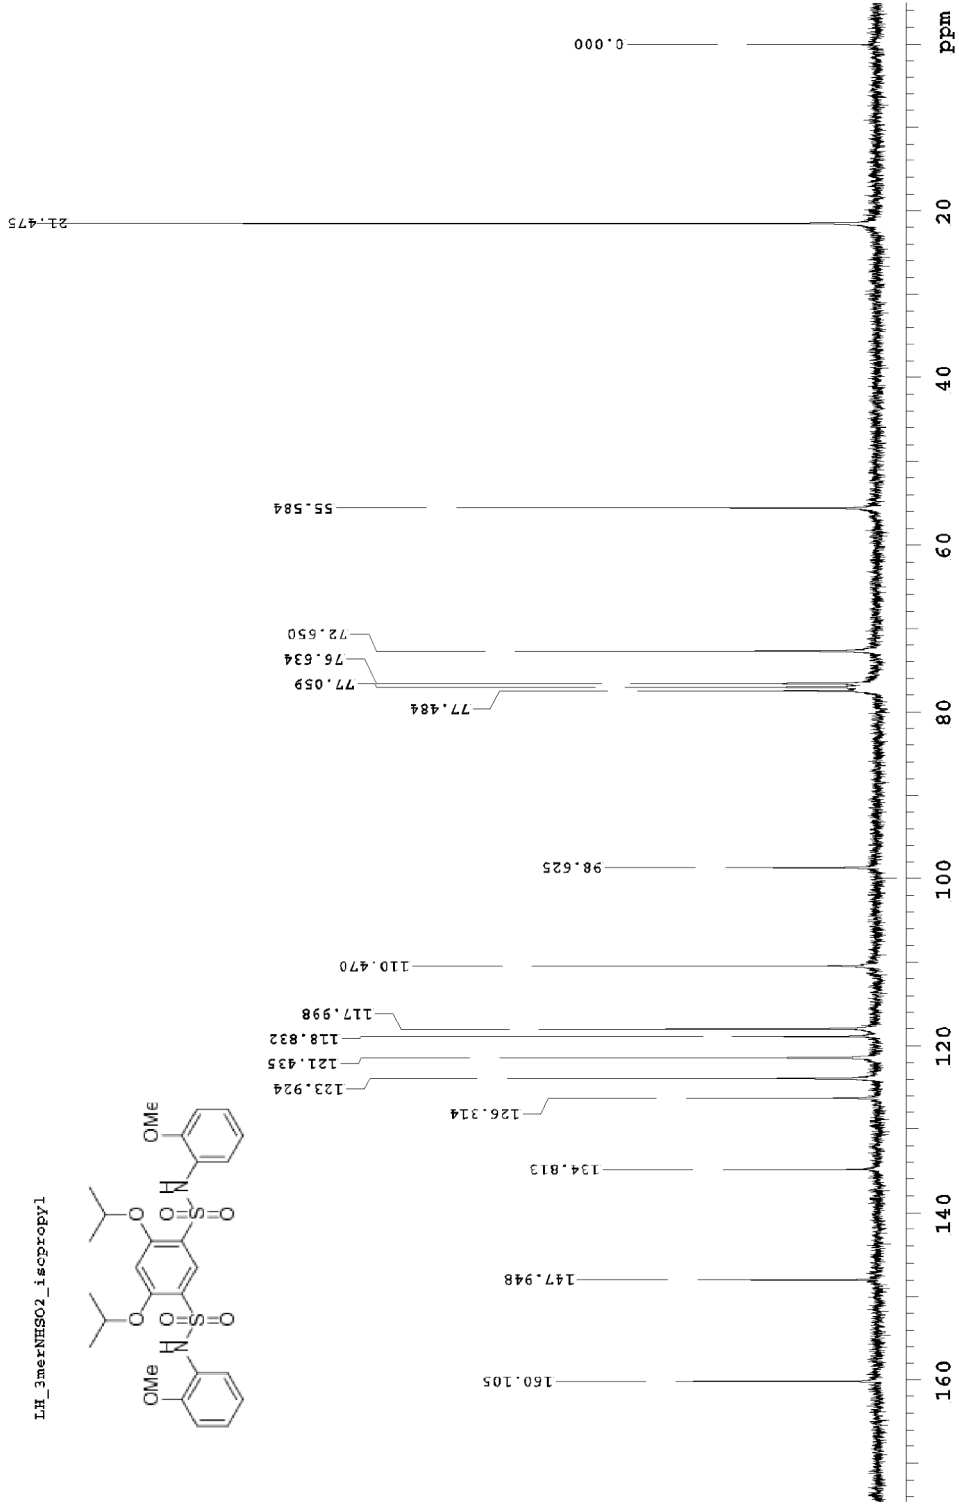

Supplement: pnas_0602912103_2.pdf [file pnas_0602912103_2.pdf]

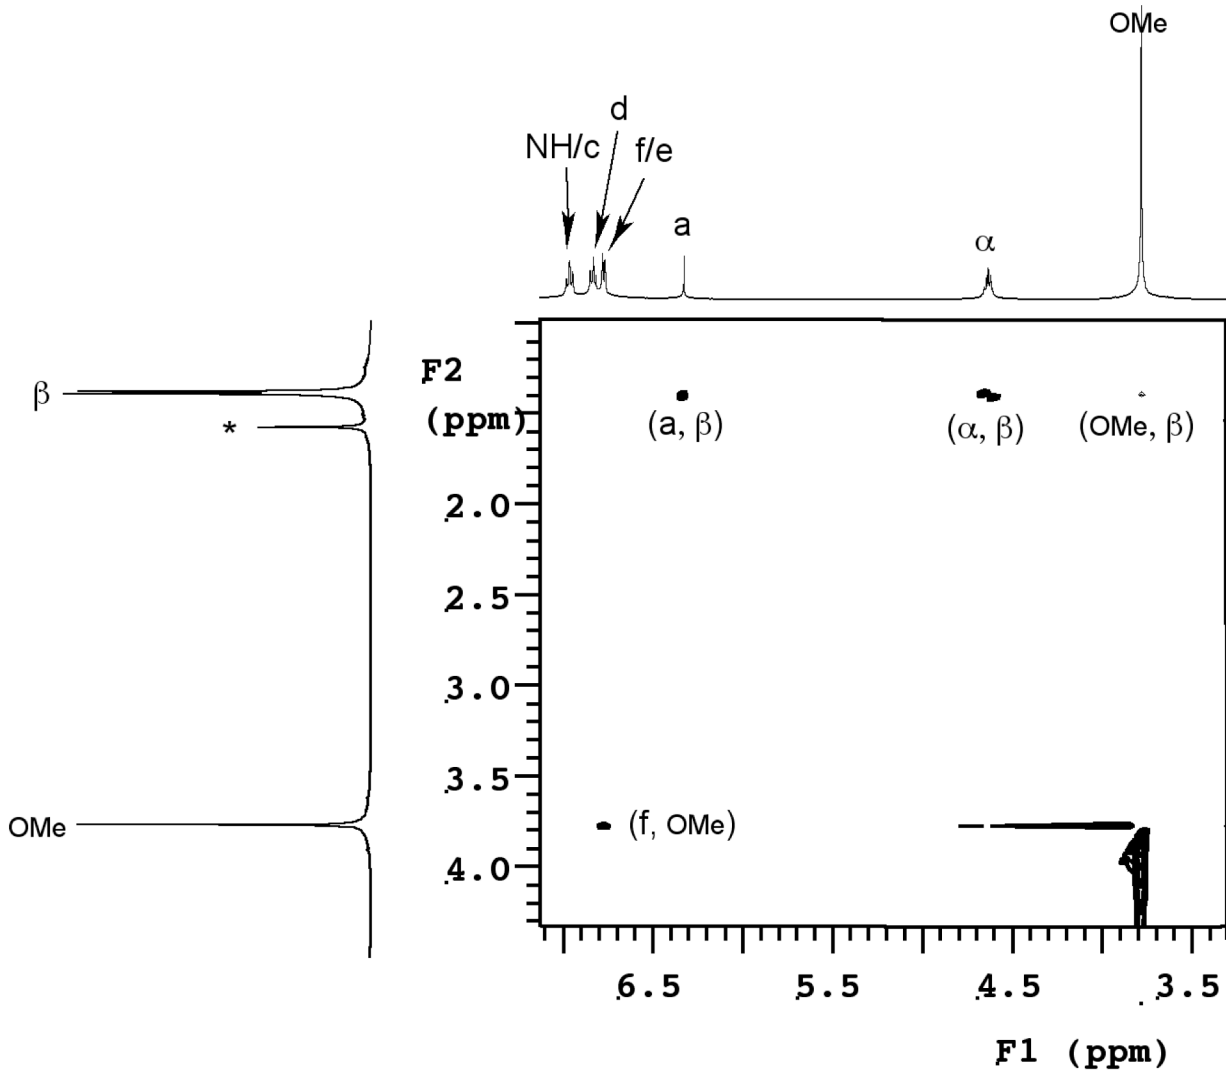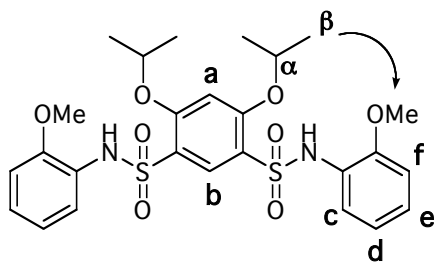

Supplement: pnas_0602912103_3.pdf [file pnas_0602912103_3.pdf]

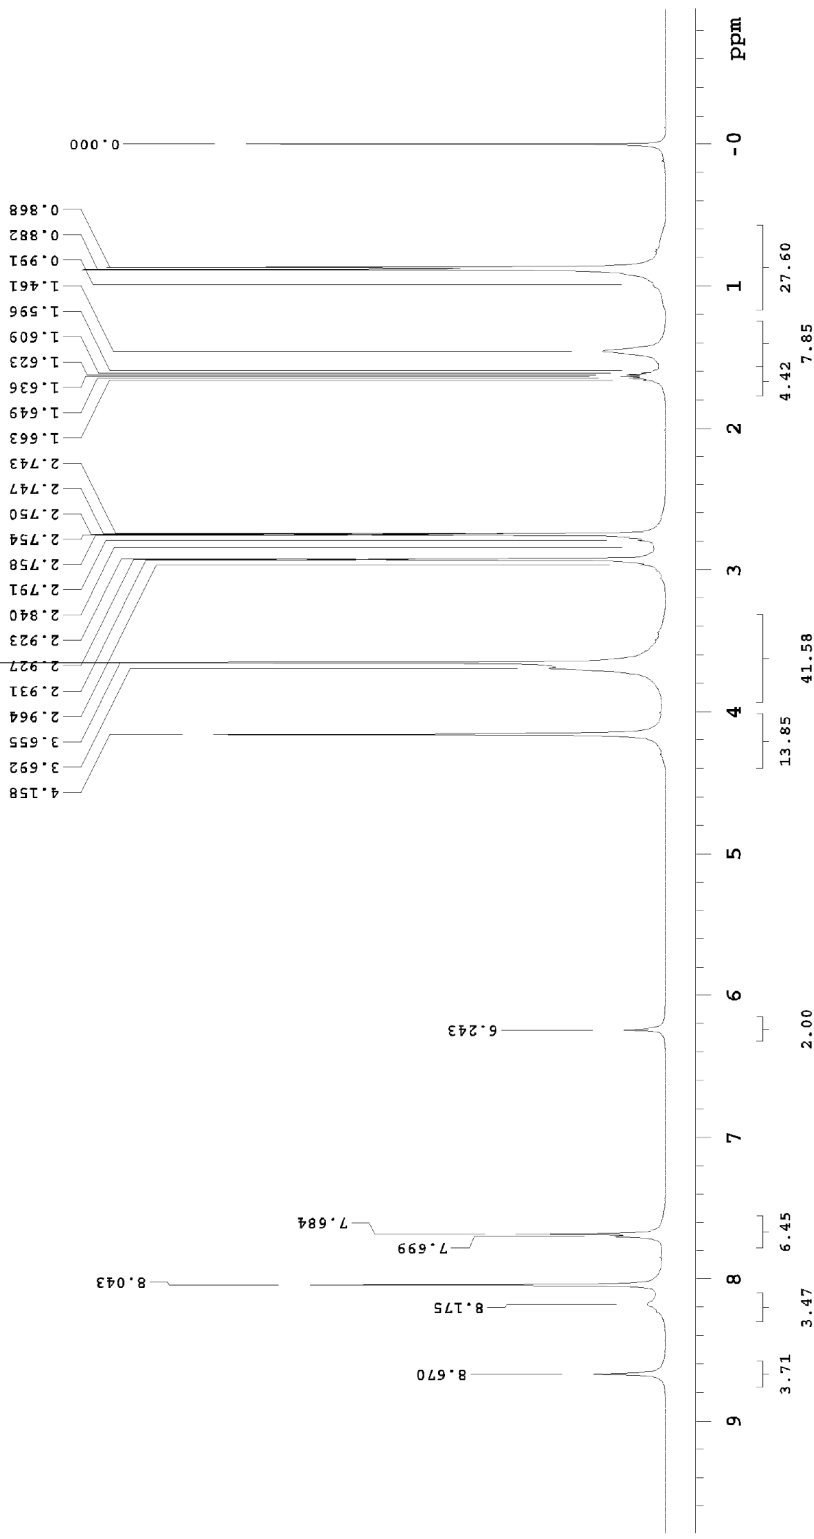

Supplement: pnas_0602912103_4.pdf [file pnas_0602912103_4.pdf]

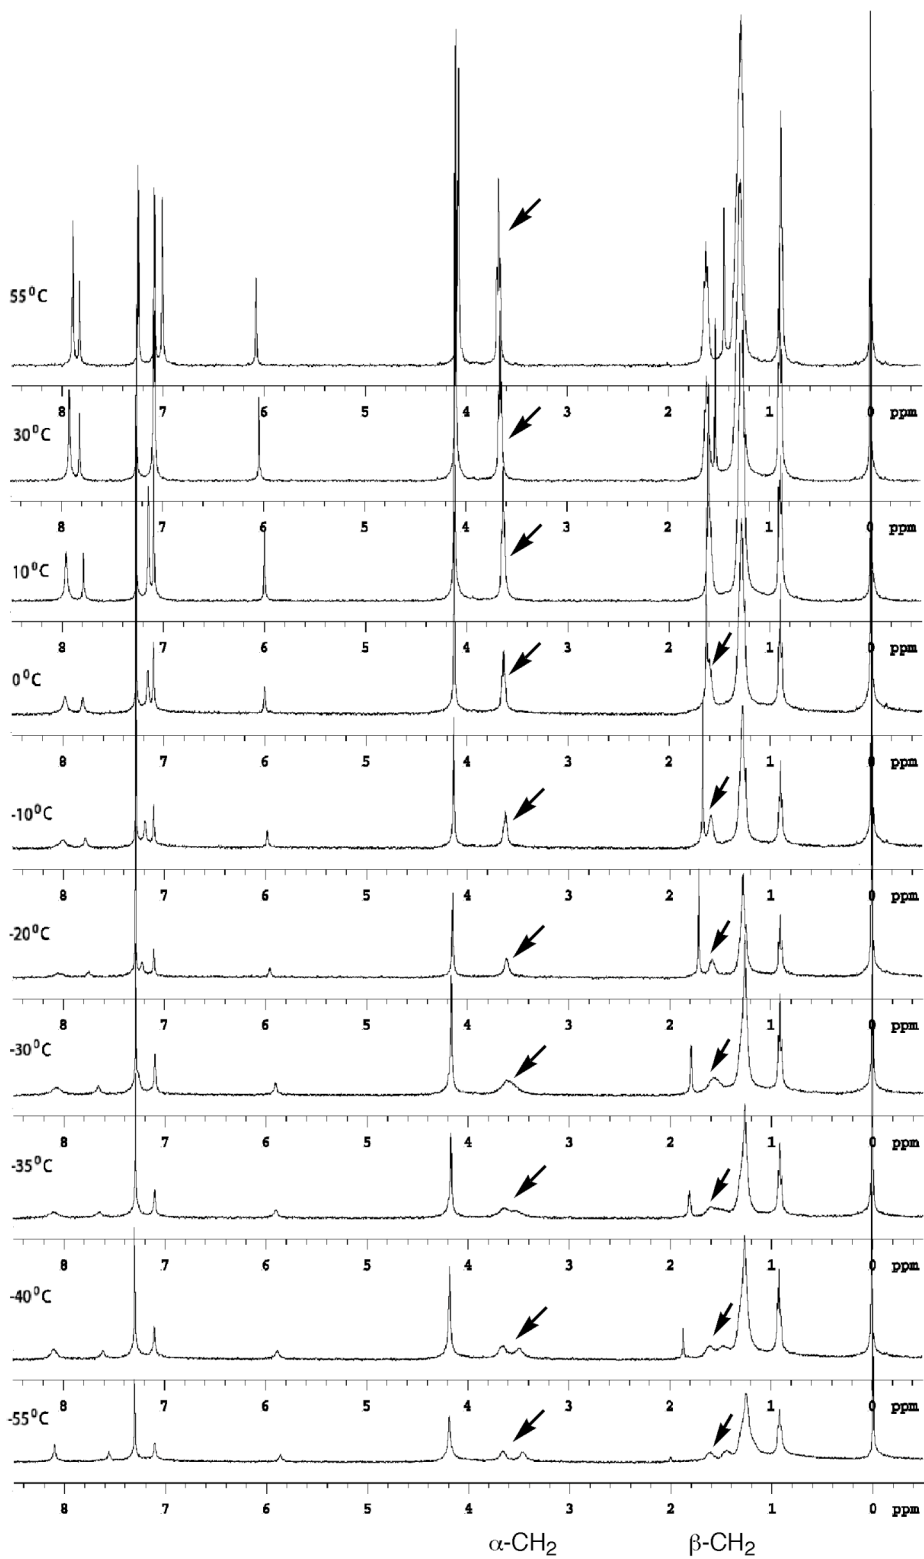

Supplement: pnas_0602912103_6.pdf [file pnas_0602912103_6.pdf]

vance 500 Bruker, A&T Center BNU  
 sample: ZOC-1-7, Solvent: DMSO  
 spectrum: hejar-1\_26

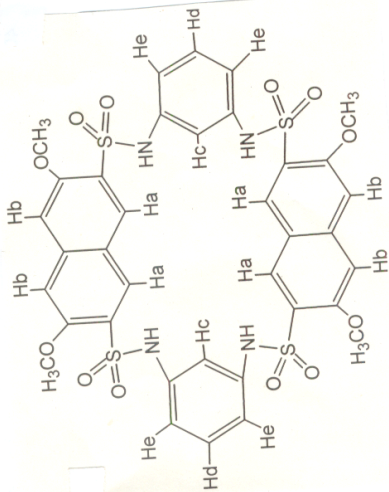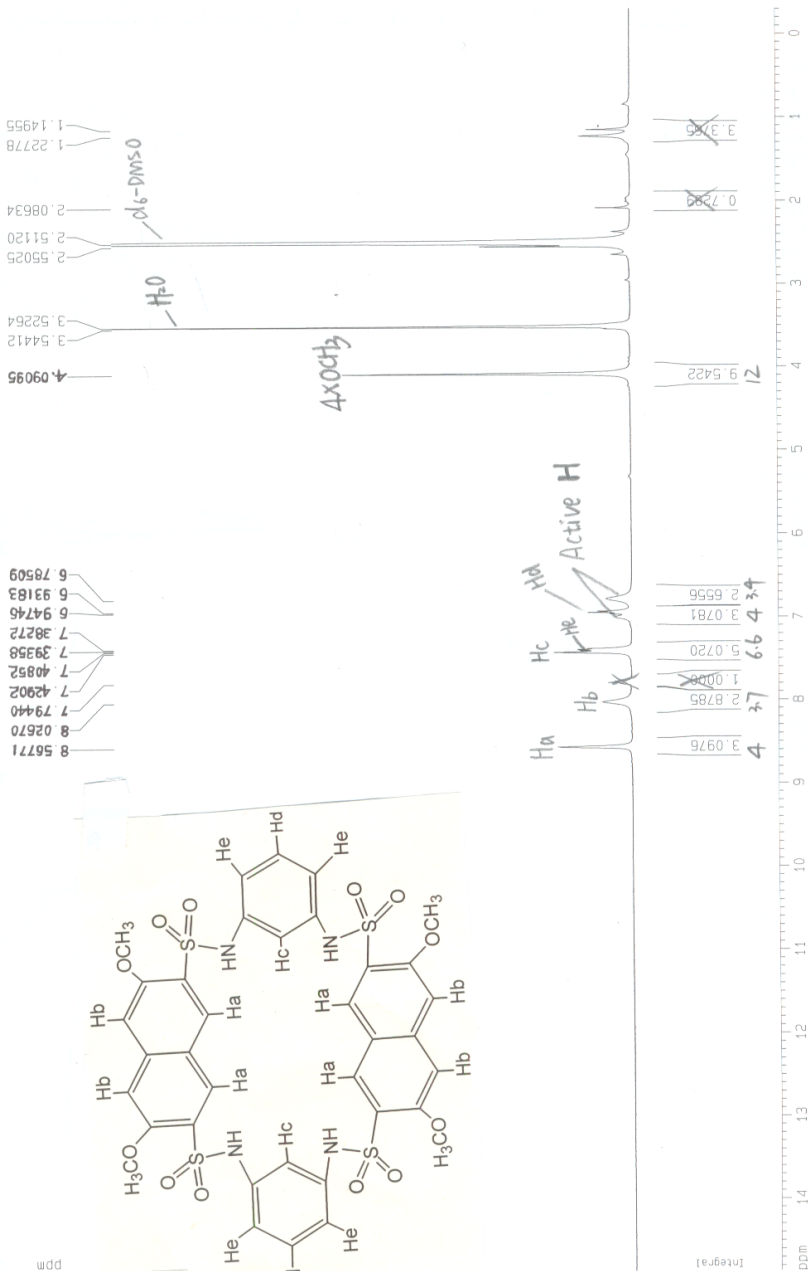

Supplement: pnas_0602912103_7.pdf [file pnas_0602912103_7.pdf]
